# Supplementary material for: A Qualitative Needs Analysis of Skin Cancer Care from the Perspectives of Patients, Physicians, and Health Insurance Representatives—A Case Study from Eastern Saxony, Germany
Source: MDPI journal article supplement (doi:10.3390/curroncol29040212), 2022-04-09
Supplement: s1 [file s1]

**Article: “A Qualitative Needs Analysis of Skin Cancer Care from the Perspectives of Patients, Physicians and Health Insurance Representatives – A Case Study from Eastern Saxony, Germany”**

**Supplementary Materials**

**Table S3.** Guiding questions for the workshop, focus groups and interviews.

|                                                                                                                                                                                                                                                                                                                                                                                                                                                                                                                                                                                                                                                                                                                                                                                                                                                                                                                                                                                                                                                                                                                                                                                                                                                                                                                                                                                                                                                                                                                                                                                                                                                                                                                                                                                                                                                                                                                                                                                                                            |
|----------------------------------------------------------------------------------------------------------------------------------------------------------------------------------------------------------------------------------------------------------------------------------------------------------------------------------------------------------------------------------------------------------------------------------------------------------------------------------------------------------------------------------------------------------------------------------------------------------------------------------------------------------------------------------------------------------------------------------------------------------------------------------------------------------------------------------------------------------------------------------------------------------------------------------------------------------------------------------------------------------------------------------------------------------------------------------------------------------------------------------------------------------------------------------------------------------------------------------------------------------------------------------------------------------------------------------------------------------------------------------------------------------------------------------------------------------------------------------------------------------------------------------------------------------------------------------------------------------------------------------------------------------------------------------------------------------------------------------------------------------------------------------------------------------------------------------------------------------------------------------------------------------------------------------------------------------------------------------------------------------------------------|
| <p>Guiding questions for the workshop with physicians</p> <ul style="list-style-type: none"> <li>• Prevention, treatment, and aftercare of skin cancer may involve multiple disciplines, facilities and/or help offers. As a physician, how would you rate the cooperation between these parties?</li> <li>• Do you see potential for optimisation in the cooperation between the disciplines, facilities and/or help offers?</li> <li>• As a physician, what goal(s) do you see for the network and how can their success be measured?</li> <li>• Who/which disciplines, facilities and/or help offers should be involved in the network?</li> <li>• What services/activities would the individual disciplines, facilities and/or help offers must provide in order to achieve the network's goals?</li> <li>• As a physician, do you see advantages in the network?</li> <li>• As a physician, do you see any disadvantages and/or barriers in the network?</li> <li>• What should the exchange of information in the network look like for you as a physician? Please give reasons for your view. As a physician, what is your view of an electronic case file in the network?</li> </ul>                                                                                                                                                                                                                                                                                                                                                                                                                                                                                                                                                                                                                                                                                                                                                                                                                               |
| <p>Guiding questions for the focus groups with patients and relatives</p> <ul style="list-style-type: none"> <li>• Prevention, treatment, and aftercare of the malign melanoma may involve multiple disciplines, facilities and/or help offers. As a patient/relative, how would you rate the cooperation between these parties?</li> <li>• Do you see potential for optimisation in the cooperation between the disciplines, facilities and/or help offers? What has been your experience as a patient/relative?</li> <li>• Based on your answers, do you see a need for a network in which several disciplines, facilities and/or help offers work together?</li> <li>• As a patient/relative, what goal(s) do you see for the network? How would you know that this goal/these goals have been met?</li> <li>• Who/which disciplines, facilities and/or help offers should be involved in the network?</li> <li>• What services/activities would the individual disciplines, facilities and/or help offers must provide in order to achieve the network's goals?</li> <li>• As a patients/relative, do you see advantages in the network?</li> <li>• As a patient/relative, do you see any disadvantages and/or barriers in the network?</li> <li>• What should the exchange of information in the network look like for you as a patient/relative? As a patient/relative, what is your view of an electronic case file in the network?</li> </ul>                                                                                                                                                                                                                                                                                                                                                                                                                                                                                                                                                                      |
| <p>Guiding questions for the interviews with health insurance company representatives</p> <ul style="list-style-type: none"> <li>• Prevention, treatment, and aftercare of the malign melanoma may involve multiple disciplines, facilities and/or help offers. From the perspective of the health insurance company, how would you rate the cooperation between these parties?</li> <li>• Do you see potential for optimisation in the cooperation between the disciplines, facilities and/or help offers? What has been your experience from the perspective of the health insurance company?</li> <li>• Do you see a need for a network in which several disciplines, facilities and/or help offers work together?</li> <li>• From the perspective of the health insurance company, what goal(s) do you see for the network? How would you know that this goal/these goals has/have been met?</li> <li>• Who/which disciplines, facilities and/or help offers should be involved in the network? What services/activities would the individual disciplines, facilities and/or help offers must provide in order to achieve the network's goals?</li> <li>• How would you see the role of the health insurance company in the network?</li> <li>• What would a network have to include for you to participate from a health insurance perspective?</li> <li>• In your opinion, what criteria would a network have to fulfill in order for you, as a representative of the health insurance company, to consider financial support?</li> <li>• From the perspective of the health insurance company, do you see advantages in the network?</li> <li>• From the perspective of the health insurance company, do you see any disadvantages and/or barriers in the network?</li> <li>• What should the exchange of information in the network look like for you as a health insurance company? From the perspective of the health insurance company, what is your view of an electronic case file in the network?</li> </ul> |
